# Supplementary material for: A portable smartphone platform utilizing dual-sensing signals for visual determination of semicarbazide in food samples
Source: Royal Society of Chemistry journal article supplement (doi:10.1039/d4tb00001c), 2024-01-01
Supplement: d4tb00001c1.pdf [file d4tb00001c1.pdf]

## **Portable smartphone platform utilizing dual-sensing signals for visual determination of semicarbazide in food samples**

Lingyun Wang <sup>a,\*</sup>, Bihong Lai <sup>a</sup>, Xueguang Ran <sup>b</sup>, Hao Tang <sup>a</sup> and Derong Cao <sup>a</sup>

<sup>a</sup> Key Laboratory of Functional Molecular Engineering of Guangdong Province, School of Chemistry and Chemical Engineering, South China University of Technology, 381 Wushan Road, Guangzhou, China, 510641. E-mail: [lingyun@scut.edu.cn](mailto:lingyun@scut.edu.cn)

<sup>b</sup> Institute of Animal Science, Guangdong Academy of Agricultural Sciences, State Key Laboratory of Swine and Poultry Breeding Industry, China, 51064.

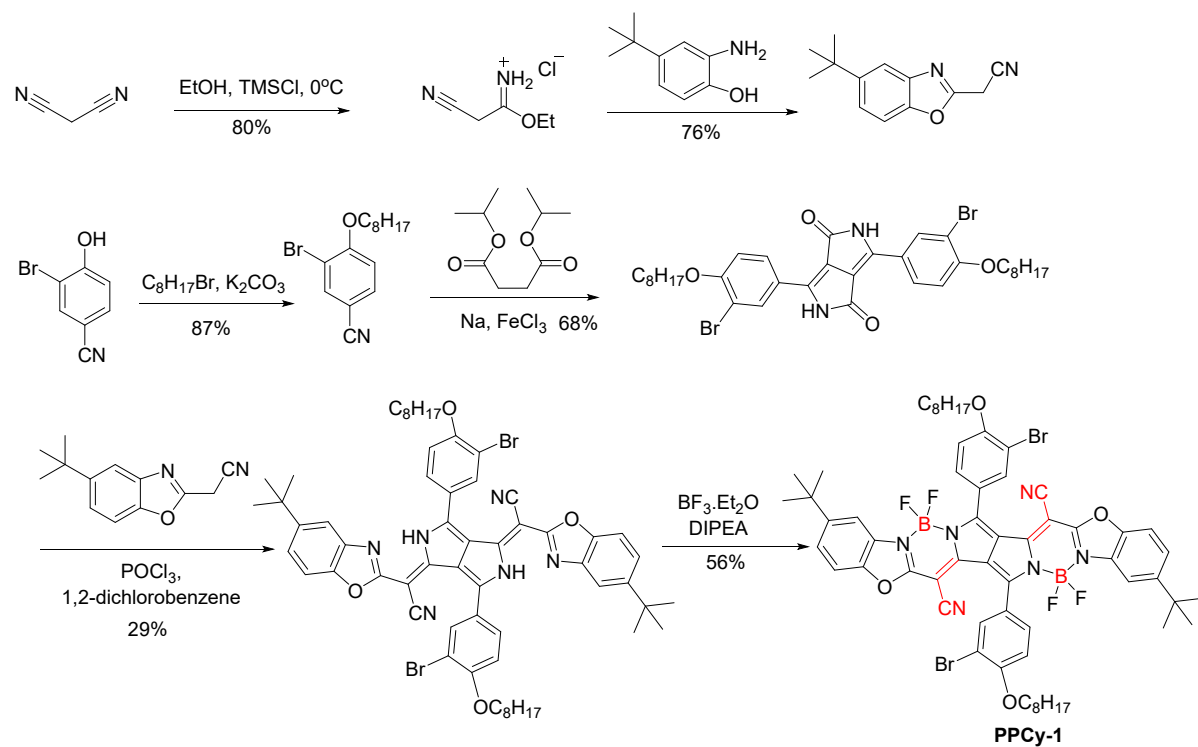

**Scheme S1** The synthetic route of **PPCy-1**.

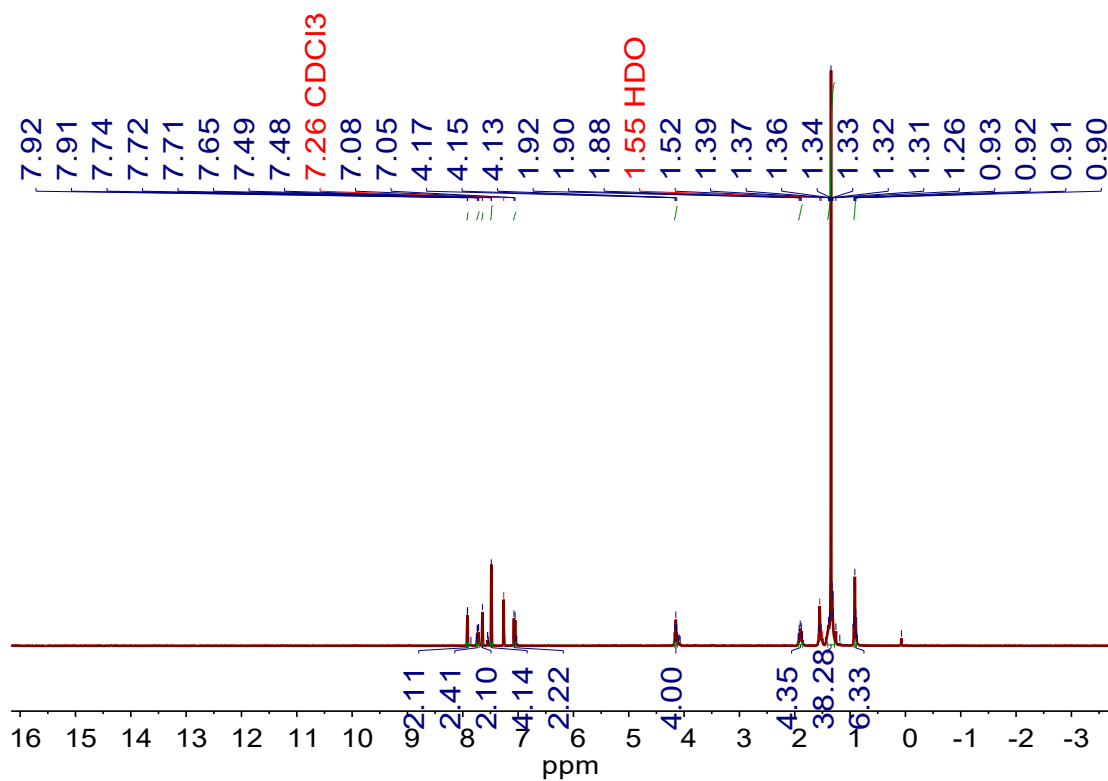

**Figure S1** <sup>1</sup>H NMR spectrum of **PPCy-1** in CDCl<sub>3</sub>.

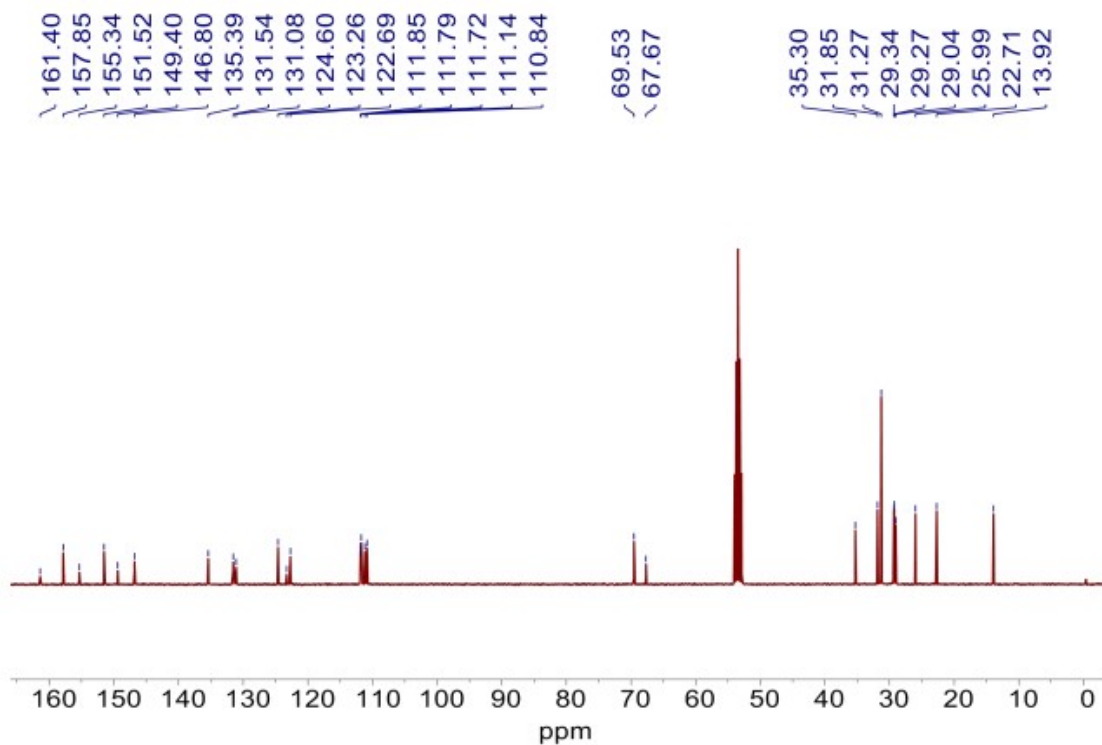

Figure S2  $^{13}\text{C}$  NMR spectrum of PPCy-1 in  $\text{CDCl}_3$ .

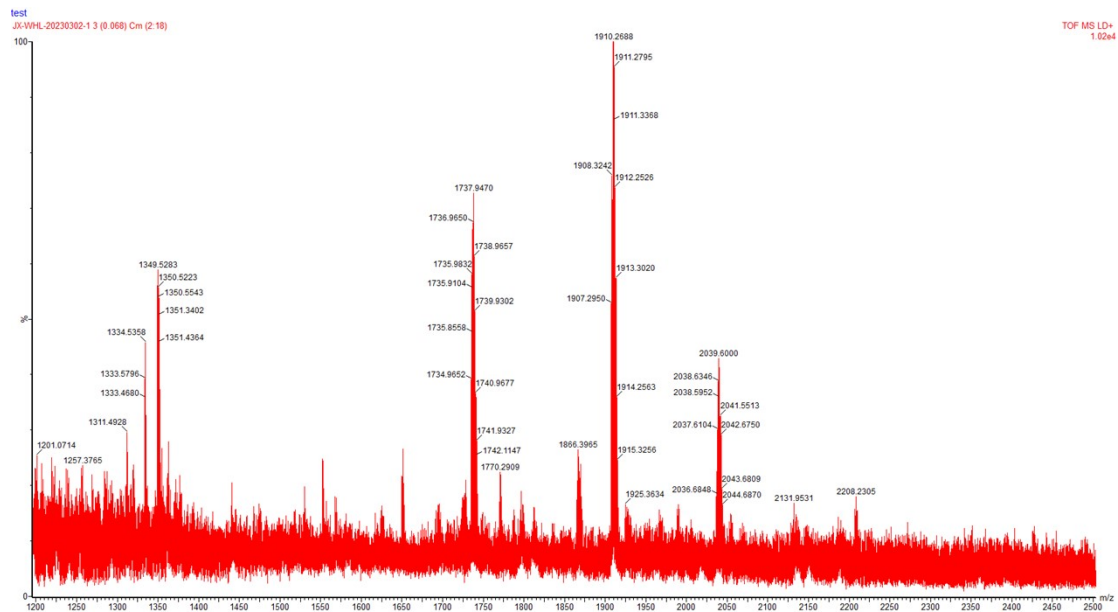

Figure S3 ESI-MS spectrum of PPCy-1.

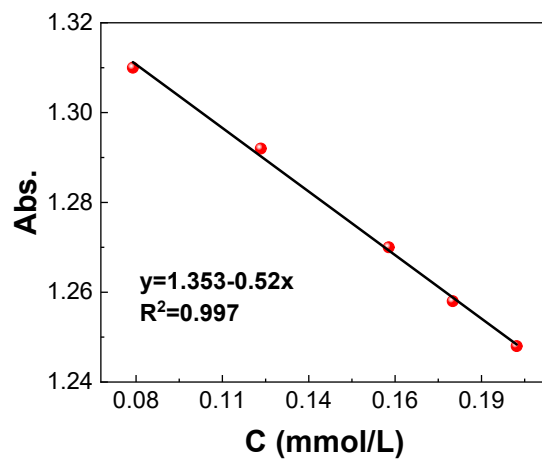

Figure S4 The linear plot of absorption band at 690 nm vs. SEM concentration.

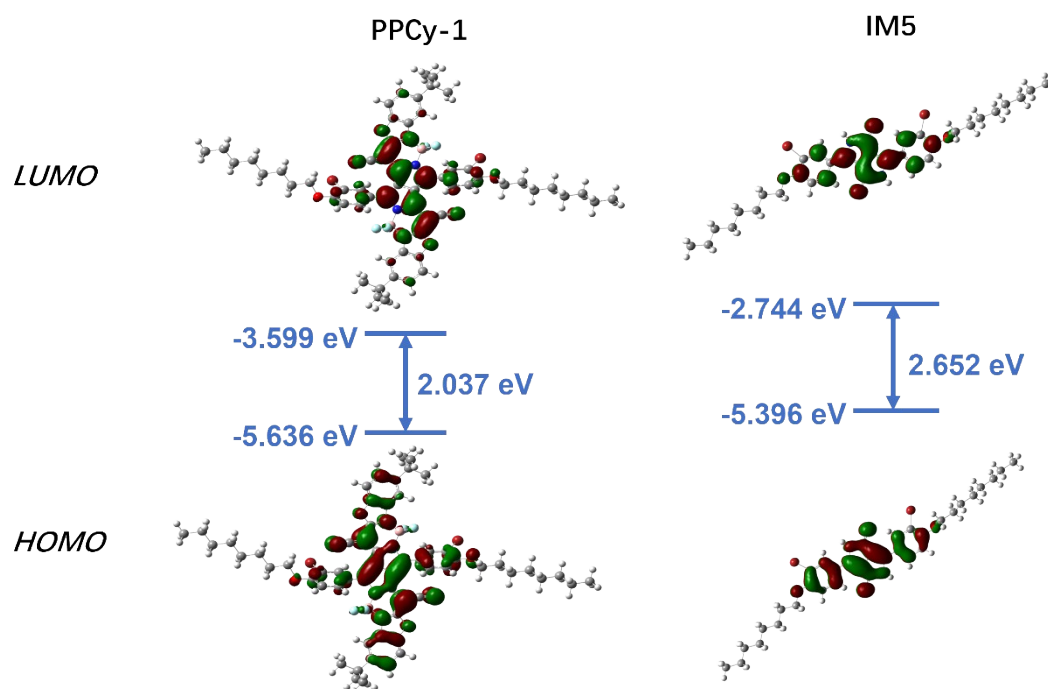

Figure S5 The DFT results of PPCy-1 and IM5.
